# Strengths and potential pitfalls of hay-transfer for ecological restoration revealed by RAD-seq analysis in two floodplain *Arabis* species

Hannes Dittberner<sup>1</sup>, Christian Becker<sup>2</sup>, Wen-Biao Jiao<sup>3</sup>, Korbinian Schneeberger<sup>3</sup>, Norbert Hölzel<sup>4</sup>, Aurélien Tellier<sup>5</sup>, Juliette de Meaux<sup>1</sup>

Affiliations: <sup>1</sup>Institute of Botany, University of Cologne, 50674 Cologne, Germany; Cologne Center for Genomics, University of Cologne, 50931 Cologne, Germany; <sup>3</sup>Max-Planck-Institute for Plant Breeding Research, 50829 Cologne, Germany; <sup>4</sup>Institute of Landscape Ecology, University of Münster, 48149 Münster, Germany; <sup>5</sup>Center of Life and Food Sciences Weihestephan, Technische Universität München, 85354, Freising, Germany

## Keywords

genetic diversity; RAD-seq; restoration genetics; hybridization; population structure; reference genome

## Abstract

Achieving high intraspecific genetic diversity is a critical goal in ecological restoration as it increases the adaptive potential and long-term resilience of populations. Thus, we investigated genetic diversity within and between pristine sites in a fossil flood-plain and compared it to sites restored by hay-transfer between 1997 and 2014. RAD-seq genotyping revealed that the stenoecious flood-plain species *Arabis nemorensis* is co-occurring in pristine and restored sites with its relative *Arabis sagittata*, which has a documented preference for dry calcareous grasslands but has not been reported in floodplain meadows. We show that hay-transfer maintains genetic diversity for both species. In addition, in *A. sagittata*, transfer from multiple genetically isolated pristine sites resulted in restored sites with increased diversity and admixed

local genotypes. In *A. nemorensis*, transfer also maintained diversity, but did not create novel admixture dynamics because genetic diversity between pristine sites was less differentiated. Thus, the effects of hay-transfer on genetic diversity also depend on the genetic makeup of each species in the donor communities, especially when material is mixed. Our results demonstrate the efficiency of hay-transfer for habitat restoration and emphasize the importance of pre-restoration characterization of micro-geographic patterns of intraspecific diversity of the community to guarantee that restoration practices reach their goal, i.e. maximize the adaptive potential of the entire restored plant community. Overseeing these patterns may differentially alter the adaptive potential of species present, thereby altering the balance between species in the community. Additionally, our comparison of summary statistics obtained from *de novo* and reference-based RAD-seq pipelines show that the genomic impact of restoration can be reliably monitored on species lacking prior genomic knowledge.

## Introduction

Habitat degradation is an ever growing problem in our modern world, causing unprecedented loss of biodiversity and essential ecosystem services (Baillie, Hilton-Taylor, & Stuart, 2004). Thus, there is a growing demand for ecological restoration, i.e. measures assisting the recovery of ecosystems that have been degraded, damaged or destroyed (Society for Ecological Restoration International Science & Policy Working Group, 2004). However, ecological restoration is a difficult process rarely leading to full ecosystem recovery (Benayas, Newton, Diaz, & Bullock, 2009). Thus, the young field of restoration ecology, which studies ecological processes in the light of restoration, is vital to improve restoration practices (Bullock, Aronson, Newton, Pywell, & Rey-Benayas, 2011; Roberts, Stone, & Sugden, 2009; Suding, 2011).

One of the main goals of ecological restoration is the recovery of biodiversity, including both species richness and intraspecific genetic diversity (henceforth called genetic diversity). Genetic diversity has generally positive effects on ecosystems (reviewed in Hughes, Inouye, Johnson, Underwood, & Vellend, 2008). For example, experimentally increasing the genetic diversity of *Solidago altissima* increased primary above-ground biomass productivity and arthropod

diversity (Crutsinger et al., 2006). Genetic diversity also boosts resistance of populations to invasion and environmental fluctuations, presumably because it enhances the adaptive potential of populations (Reed & Frankham, 2003; Vrijenhoek, 1994). For example, high diversity experimental *Arabidopsis thaliana* populations showed higher resistance against invasion by *Senecio vulgaris* than low diversity populations (Scheepens, Rauschkolb, Ziegler, Schroth, & Bossdorf, 2017). Moreover, *Zoestra marina* populations with higher genetic diversity showed increased biomass production, plant density and faunal abundance during an extremely warm period (Reusch, Ehlers, Hämmerli, & Worm, 2005). Concordantly, restored populations of *Z. marina* with increased genetic diversity showed longer plant survival, increased faster in density and provided better ecosystem services. This effect was stable in a range of environmental conditions along a water-depth gradient (Reynolds, McGlathery, & Waycott, 2012). These examples demonstrate the importance of genetic diversity for ecosystem function and stability and hence the need to consider population genetics in the design and evaluation of restoration practices, which is the focus of restoration genetics.

Restoration genetics can not only inform the planning of restoration efforts, e.g. by identifying suitable source populations, but also help evaluating the success of restoration projects, e.g. by monitoring genetic diversity in restored populations (Mijangos, Pacioni, Spencer, & Craig, 2015; Williams, Nevill, & Krauss, 2014). In fact, studies comparing the level of genetic diversity in pristine and restored populations frequently report limited success, with a reduction of genetic diversity in restored populations. This decline in genetic diversity may be caused by genetic bottlenecks in plant nurseries, biases introduced by seed harvesting strategies, founder effects during recolonization and/or unreliable commercial seeds (reviewed in Mijangos, Pacioni, Spencer, & Craig, 2015). By contrast, the transfer of seed-containing hay from pristine (donor) to restoration (donee) sites, termed hay-transfer, is expected to limit the loss of genetic diversity and maintain site-specific local adaption (Hufford & Mazer, 2003; Kathrin Kiehl, Kirmer, & Shaw, 2014). In addition, this method has the unique feature that it can restore an entire community of genetically intact populations and thus is the best method available for restoring entire ecosystems (Hölzel & Otte, 2003; K. Kiehl, Kirmer, Donath, Rasran, & Hölzel, 2010). So far,

however, there is no empirical support for the efficiency of this practice (Bucharova et al., 2017), especially since many species maintain seed banks in the soil. Indeed, the genetic diversity specific to the seed bank will not be sampled with the hay, although it is known that it can contribute significantly to the maintenance of diversity (Tellier, Laurent, Lainer, Pavlidis, & Stephan, 2011).

The field of restoration genetics has witnessed a major technological shift over recent years. Restoration genetics studies have initially relied on microsatellites and AFLP markers and thus provided a limited overview on patterns of genetic variation within and between restored or pristine populations (reviewed in Mijangos et al., 2015). Yet, genotyping-by-sequencing (GBS) methods are beginning to be more broadly adopted (Gruenthal et al., 2014; Massatti, Doherty, & Wood, 2018; O'Leary, Hollenbeck, Vega, Gold, & Portnoy, 2018; Torres-Martinez & Emery, 2016). These methods drastically reduce sequencing costs through strategies to sequence a reduced portion of the genome, e.g. Restriction site Associated DNA-sequencing (RAD-seq) (Elshire et al., 2011; Etter, Bassham, Hohenlohe, Johnson, & Cresko, 2011; Peterson, Weber, Kay, Fisher, & Hoekstra, 2012). GBS approaches sample genomic regions that are sufficiently large to allow resolving patterns of genetic diversity and spatial structure even at very local scale where overall levels of genetic diversity are low (Bradbury et al., 2015; Jeffries et al., 2016). In principle, GBS approaches have a third major advantage: they are well suited to unravel genetic diversity in non-model species without prior genomic information. Yet, the accuracy of individual genotyping in the absence of a reliable reference genome has been questioned (Shafer et al., 2016). Since target species in restoration projects rarely coincide with species or genera with advanced prior genomic knowledge, it is important to assess whenever possible, whether conclusions from RAD-seq-based restoration genetics studies depend on the availability of a reference genome.

Flood-plain meadows are species-rich ecosystems, accommodating many endangered and stenoecious species adapted to the variable moisture regime. Due to increased agricultural land-use and river regulation a large proportion of flood-plain ecosystems are degraded and

have become a target for ecological restoration. Here, we use RAD-seq to evaluate whether genetic diversity is maintained in flood-plain meadows restored by hay-transfer in the Upper Rhine valley in Germany (Hölzel & Otte, 2003, Donath, Bissels, Hölzel, & Otte, 2007). We focused on *Arabis nemorensis*, a stenoecious species typically restricted to flood-plain meadows, and thus strongly endangered in Central Europe (Schnittler & Günther, 1999). *A. nemorensis* is a short-lived, mostly bi-annual hemicryptophyte that is known to maintain a long-lived soil seed bank (Hölzel & Otte, 2004). It is part of the *Arabis hirsuta* species aggregate, which comprises several morphologically similar but ecologically diverse species (Karl & Koch, 2014).

We performed RAD-seq for over 130 lines collected across pristine and restored sites. This dataset allows us to ask the following questions: i) what is the level of genetic diversity and structuration of the pristine sites that served as source populations for restoration? ii) do restored sites show a lower level of genetic diversity than the pristine sites? iii) how did restoration affect the distribution of diversity within and among restored sites? iv) is the use of a reference genome necessary to reliably characterize the impact of restoration on genetic diversity? This work demonstrates that a thorough genetic analysis of source and restored sites reveals the complex dynamics at stake in the restoration process. We reveal the unanticipated co-occurrence of *A. nemorensis* with *A. sagittata*, a morphologically similar and closely related species, which normally exhibits a preference for drier habitats such as e.g. calcareous grasslands (Hand & Gregor, 2006). We further show that restoration by hay-transfer has maintained and can even enhance local diversity. Our analysis further shows that the use of a reference genome yields higher estimates of genetic diversity, but does not affect the resolution of patterns of genetic variation within and between sites, indicating that this approach can find broad applications in the field.

# Methods

## Plant material and DNA extraction

The sampling area comprises the fossil, dyke-protected flood plain of the River Rhine near Riedstadt in Hessen, Germany. The area is dominated by arable fields, but also contains remnants of pristine flood meadow communities in low lying depressions that are submerged by ascending groundwater during high floods of the River Rhine. Since ca. 20 years, new flood meadow communities have been restored on ex-arable land using the transfer of green hay from the pristine sites as donors to overcome significant dispersal limitation (Hölzel & Otte, 2003). During this process, hay from different donor sites was placed in distinct yet adjacent patches, making admixture possible. Since restoration is still ongoing, restored sites differ in age (Table S1). In two consecutive years, we harvested seeds from a total of 134 plants of *Arabis nemorensis/sagittata* in nine sites named from A to I, in order of collection. Four sites were sampled in pristine habitat (B, C, D and I) and five in restored habitat (A, E, F, G and H, Figure 1). Some sites were not sampled in both years, either because no plants were present or because the site was already mown (see Table S1). To produce material for DNA extraction, we stratified seeds on wet filter paper for 6 days at 4°C in darkness. Afterwards we sowed seeds in soil (33% VM, 33% ED-73, 33% Seramis (clay granules)). After 4 to 6 weeks of growth in the greenhouse, we harvested about 200mg of leaf material from one offspring of each wild parent (genotype). We homogenized freshly harvested leaf material using a Precellys Evolution homogenizer (Bertin technologies) for 2x20 seconds at 6800 rpm. We extracted DNA using the NucleoSpin Plant II Mini kit (Macherey-Nagel) following the manufacturer's instructions. We verified DNA quality using gel-electrophoresis with a 0.8% agarose gel. We measured DNA quantity using Qubit (broad-range kit) following manufacturer's instructions.

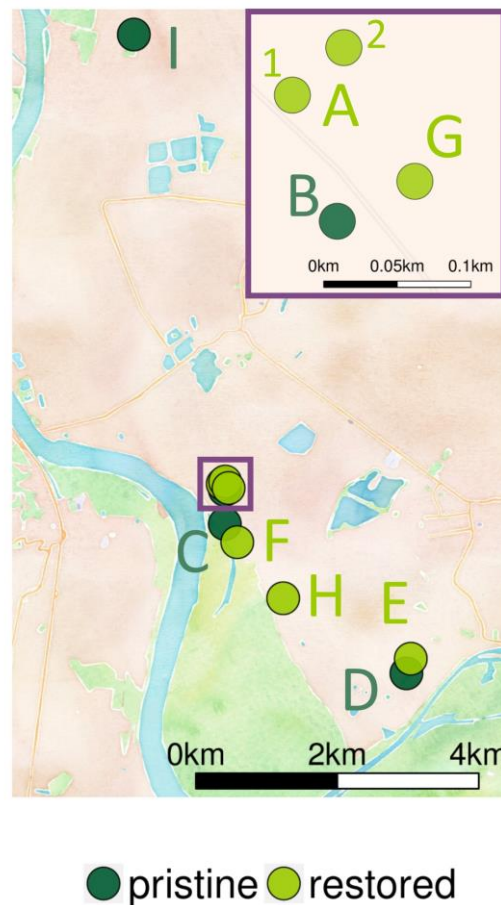

**Figure 1: Overview map of studied sites**

Each point on the map represents one site. The color of the points represents the type of the site, i.e. whether it is pristine or restored. The purple square represents the area shown in the zoomed inset. All sites, except site F are protected by a dyke.

### Draft genome assembly

To facilitate genotype calling we assembled a draft genome for one *A. nemorensis* accession (ID 29). For assembly, we used the ALLPATHS-LG assembler, which requires a specific set of sequencing libraries. Library preparation and sequencing was done at the Cologne Center for Genomics. Three libraries were created: one paired-end library with approximately 280 bp insert size creating an overlap of 20 bp with 150 bp reads, and two mate-pair libraries with 3 kbp and 6 kbp inserts, respectively. All libraries were sequenced together as 150bp paired-end reads as part of an Illumina HiSeq 4000 lane for a total of 66 Gbp.

We used *FastQC* (Andrews, 2010) to quality-check the resulting reads. We filtered the resulting reads to remove reads shorter than 100bp and trimmed Illumina adapters using *Cutadapt* (Martin, 2011). We assembled reads using the *ALLPATHS-LG* assembler (Gnerre et al., 2011) with default settings, running it on the CHEOPS high-performance computing cluster of the University of Cologne. The resulting contig assembly had a size of 199 Mbp and an N50 of 47 kbp. The scaffold assembly had a size of 206 Mbp and an N50 102 kbp. To further scaffold the genome, we generated 2.9 Gbp of PacBio sequence data. Library preparation and sequencing was done at the Max-Planck-Institute for Plant Breeding Research (Cologne, Germany). We scaffolded the genome using *OPERA-LG* with default settings (Gao, Bertrand, Chia, & Nagarajan, 2016). This increased the N50 to 150kbp. To achieve chromosome-level assembly, we made use of the available reference genome of *Arabis alpina* (Jiao et al., 2017; Willing et al., 2015). We created the pseudo-chromosome assembly using the *CoGe* website (Lyons & Freeling, 2008). We aligned our draft genome with the *Arabis alpina* genome using *SynMap2* (Haug-Baltzell, Stephens, Davey, Scheidegger, & Lyons, 2017) and afterwards performed syntenic path assembly (Lyons, Freeling, Kustu, & Inwood, 2011) to assemble the chromosomes. The pseudo-chromosomes had a total size of 192 Mbp and were used for all following analysis. Repetitive regions in the genome were annotated using RepeatMasker (AFA Smit, Hubley, & Green, 2013) 'brassicaceae' as the taxon search term.

The size of the genome was estimated by flow-cytometry, which was performed commercially at Plant Cytometry Services. The estimated genome size was 274 Mbp. Thus, the assembly size was 70% of the genome size.

## Annotation

Transposable elements (TE) were annotated using the softwares RepeatModeler (Smit & Hubley, 2008) and RepeatMasker (AFA Smit et al., 2013). The consensus repeat library was first constructed by RepeatModeler and then used by RepeatMasker to search TEs. Protein-coding gene were annotated by integrating predictions of *ab initio* gene annotation tools and alignments of homologous proteins. Three different tools including Augustus v3.2.3 (Stanke &



Waack, 2003), GlimmerHMM v3.0 (Majoros, Pertea, & Salzberg, 2004) and SNAP v2013 (Korf, 2004) were used to predict the initial gene models. Protein sequences from *A. thaliana*, *A. lyrata* and *A. alpina* (Arabidopsis Genome Initiative, 2000; Hu et al., 2011; Willing et al., 2015) were aligned to the assembly by the tool Exonerate v2.2.0 (Slater & Birney, 2005). Then, the *ab initio* predictions and protein alignment hints were further combined to build the consensus gene models by the tool EVIDENCEModeler (EVM) v2012 (Haas et al., 2008). Finally, TE related genes in these models were annotated by checking the TE annotation, blastp (Altschul, Gish, Miller, Myers, & Lipman, 1990) alignments with Plant TE related proteins and blastp alignments with *A. thaliana* proteins. If a gene's protein sequence had blastp alignment identity and coverage both larger than 50% with a TE related protein, or at least 30% of its exon regions overlapped with TEs but had no good blastp hit (identity >50% and coverage >50%) from *A. thaliana* protein sequences, this gene would be marked as a TE related gene.

### RAD-sequencing and SNP calling

We genotyped 134 samples using the original RAD-sequencing (RADseq) protocol (Etter et al., 2011), with the following modifications (Document S1): i) we used the enzyme KpnI-HF (New England Biolabs) for DNA digestion, ii) we ligated digested DNA with complementary adapters containing one of ten different barcodes and a stretch of five random nucleotides, used for post-hoc removal of PCR duplicates (Table S2), iii) we created 14 pools of 10 barcoded samples each in equal amounts, iv) we used indexed reverse primers for amplification, described in (Peterson, Weber, Kay, Fisher, & Hoekstra, 2012), to allow multiplexing of pools. Libraries were sequenced on two Illumina HiSeq 4000 lanes with 2x150bp.

We used *FastQC* (Andrews, 2010) to quality-check the resulting reads. We trimmed adapters and removed reads shorter than 100bp using *Cutadapt* (Martin, 2011). We removed PCR duplicates based on a 5 bp stretch of random nucleotides at the end of the adapter, using the *clone\_filter* module of *Stacks* version 1.37 (Catchen, Hohenlohe, Bassham, Amores, & Cresko, 2013). We de-multiplexed samples using the *process\_radtags* module from *Stacks*. We filtered

reads with ambiguous barcodes (allowed distance 2) and cut-sites, reads with uncalled bases and low-quality reads (default threshold).

For reference-based genotyping, we mapped reads using *BWA* (Li & Durbin, 2009) with default settings. We filtered mapped reads using *SAMtools* (Li et al., 2009) and custom python scripts using the following criteria to remove reads: mapping quality < 30, number soft-clipped bases > 30; reads were unpaired; mates mapped on different chromosomes; mate mapping distance > 700. We called genotypes using *SAMtools mpileup* and *VarScan2* (Koboldt et al., 2012) with the following options: base quality > 20; re-calculation of base quality on the fly (-E option); read depth > 14; strand filter de-activated; SNP calling p-value < 0.01. We filtered genotyped loci using *VCFTools* (Danecek et al., 2011) and custom python scripts removing loci with missing data in more than 5% of individuals and loci in repetitive regions. We clustered contiguous loci spaced less than 100bp apart into RAD-regions. Regions with excessively low or high coverage are likely results of allele dropout or paralogous mapping, respectively. Thus, we removed regions fulfilling one of the following criteria: mean coverage of the region greater than twice the overall mean coverage; mean coverage of the region smaller than a third of the overall mean coverage; region maximum coverage greater than twice the mean maximal coverage over all regions; region shorter than 250bp; region longer than 1300bp. Additionally, we removed regions containing loci with heterozygous frequency over 20% or 10% if either homozygous frequency was below 5%, since they likely resulted from paralogous mapping errors in the predominantly selfing *Arabidopsis* species. From the resulting genotype dataset, we extracted single nucleotide polymorphisms (SNPs) using *VCFTools* (Danecek et al., 2011).

For *de-novo*-genotyping we used the Stacks 2.2 *denovo\_map.pl* pipeline (Catchen et al., 2013). As recommended by the authors of the tool (Rochette & Catchen, 2017), we first used a subset of 15 representative genotypes to tune the parameters (-M and -n) of the algorithm, which control the number of mismatches between stacks within (M) and between (n) individuals. We varied M and n from 1 to 9. For each set of parameters, we analysed the number of loci shared between 80% of the samples. This measure peaked at the value six for M and n. Thus, we used

this value for both parameters for the full analysis. We ran the *denovo\_map.pl* pipeline using 0.01 as the p-value threshold for calling genotypes and SNPs, and otherwise default options. We used the *populations* program to create a VCF-file for further analysis using the following filters: 5% maximum missing data per locus; 20% maximum observed heterozygosity per locus; locus must be present in all sites.

### Population genetics statistics

We did all statistical analysis using R version 3.4.4 (R Development Core Team, 2008) and provide a supplemental R Markdown file (Document S2). The following packages were used for plotting: *ggplot2* (Wickham, 2009), *ggmap* (Kahle & Wickham, 2013), *ggthemes* (Arnold et al., 2017), *ggsn* (Baquero, 2017) and *heatmap3* (Zhao, Guo, Sheng, & Shyr, 2015). We performed all analysis for the reference-based and the *de-novo*-based dataset and compared the results. We used the *vcfR* package (Knaus & Grünwald, 2017) to load VCF-files into R and make the SNP data available for processing with other libraries. Based on our annotation we determined whether SNPs are in coding regions and whether they are synonymous or non-synonymous using the *PopGenome* package (Pfeifer, Wittelsbuerger, Li, & Handsaker, 2018). We performed principal component analysis (PCA) of SNP data for all samples using the *adeigenet* package (Jombart et al., 2016). Missing data was scaled to the mean for PCA. Based on the first PC we determined thresholds to assign individuals to one of the two species or to the hybrid group. We used phylogenetic markers and ploidy estimates to validate the identity of the two species (see below for details). We calculated all further statistics for both species separately.

We used the *pegas* library to calculate within-site genetic diversity (Nei's  $\pi$ ; average pairwise nucleotide differences) for each site (Paradis, Jombart, Schliep, Potts, & Winter, 2016), excluding sites with less than two individuals per respective species. We scaled all  $\pi$  estimates per genotyped base-pair. We calculated correlation coefficients between reference-based and *de-novo*-based  $\pi$  estimates using Pearson's method. We calculated pairwise  $F_{ST}$  (Nei, 1987) and genetic distance (Cavalli-Sforza & Edwards, 1967) between all pairs of sites using the *hierfstat*

package (Goudet & Jombart, 2015). Negative  $F_{ST}$  values were set to zero. Differences of genetic distance and  $F_{ST}$  among pristine and restored sites were tested using a Wilcoxon-rank-sum-test on pairwise distance matrices. We tested for correlation between the distance matrices of the reference and *de novo* datasets using a Mantel test with 10000 permutations. ADMIXTURE analysis (see below) revealed that the same genetic lineages were present in both years (Figure S1), and thus we pooled samples of both years to obtain a more accurate estimate of within site variation.

### Admixture analysis

For ADMIXTURE analysis (Alexander, Novembre, & Lange, 2009), we converted VCF-files to bed-files using PLINK (Purcell, 2009; Purcell et al., 2007). For each of the species and pipeline (reference/*de novo*), we ran ADMIXTURE analysis for  $K=1$  to  $K=9$ , with 10 iterations of cross-validation each. Before plotting, we normalized clusters across runs using CLUMPAK (Kopelman, Mayzel, Jakobsson, Rosenberg, & Mayrose, 2015). We created plots using a custom R-script. We chose  $K$  for the main figures, so that general population structure is adequately represented, taking the results of genetic distance/differentiation analysis into account. An overview of results for all values of  $K$  is shown in Figures S2-3.

### Species identification

Since some species in the *Arabis hirsuta* clade are difficult to distinguish morphologically (Gregor & Hand, 2006), we used molecular methods to assign species labels to the two species. We sequenced the internal transcribed spacer (ITS) sequence for a total of 12 individuals belonging to one of the two genetic clusters. Primers for amplification were taken from (Mummenhoff, Franzke, & Koch, 1997). We used the sequences as input to the taxonomy tool of the *Brassibase* website (Kiefer et al., 2014) and interpreted the output taking ploidy information into account. Ploidy of samples was determined commercially at Plant Cytometry Services (Didam, Netherlands).

## Results

### RAD-sequencing uncovers two hybridizing species

We genotyped 134 individuals from 10 sites – 4 pristine and 6 restored (Figure 1) – yielding 3.6 Mb of sequence of which 32,880 single nucleotide positions were polymorphic (SNPs). Only 20% of SNPs were in coding regions, 40% and 56% of which were synonymous and non-synonymous, respectively (4% unassigned). To visualize patterns of genetic diversity across sites, we conducted principal component analysis (PCA) for all individuals (Figure 2, top). Almost 80% of the total genetic variation was explained by the first principal component, which separated most individuals into two clearly defined clusters. Based on phylogenetic analysis of the ITS region, we identified one cluster as *Arabis nemorensis* and the other as *A. sagittata*, a sibling species from the *A. hirsuta* complex. Twenty-three individuals were located between the species on the first PC, indicating that these are interspecific hybrids. Most of these hybrids were closer to *A. sagittata* on the first PC, suggesting that they are fertile and preferentially back-cross with *A. sagittata* (sterile F1-hybrids would be located exactly in the middle between the two species).

Overall our sample was composed of 31% *A. nemorensis*, 52% *A. sagittata* and 17% hybrids. The species composition differed among sites (Figure 2, bottom). *A. nemorensis* was present in 7 sites (3 pristine, 4 restored), *A. sagittata* in 9 sites (3 pristine, 6 restored) and hybrids in 6 sites (3 pristine, 3 restored). Notably, the pristine site D was dominated by hybrids with over 56%.

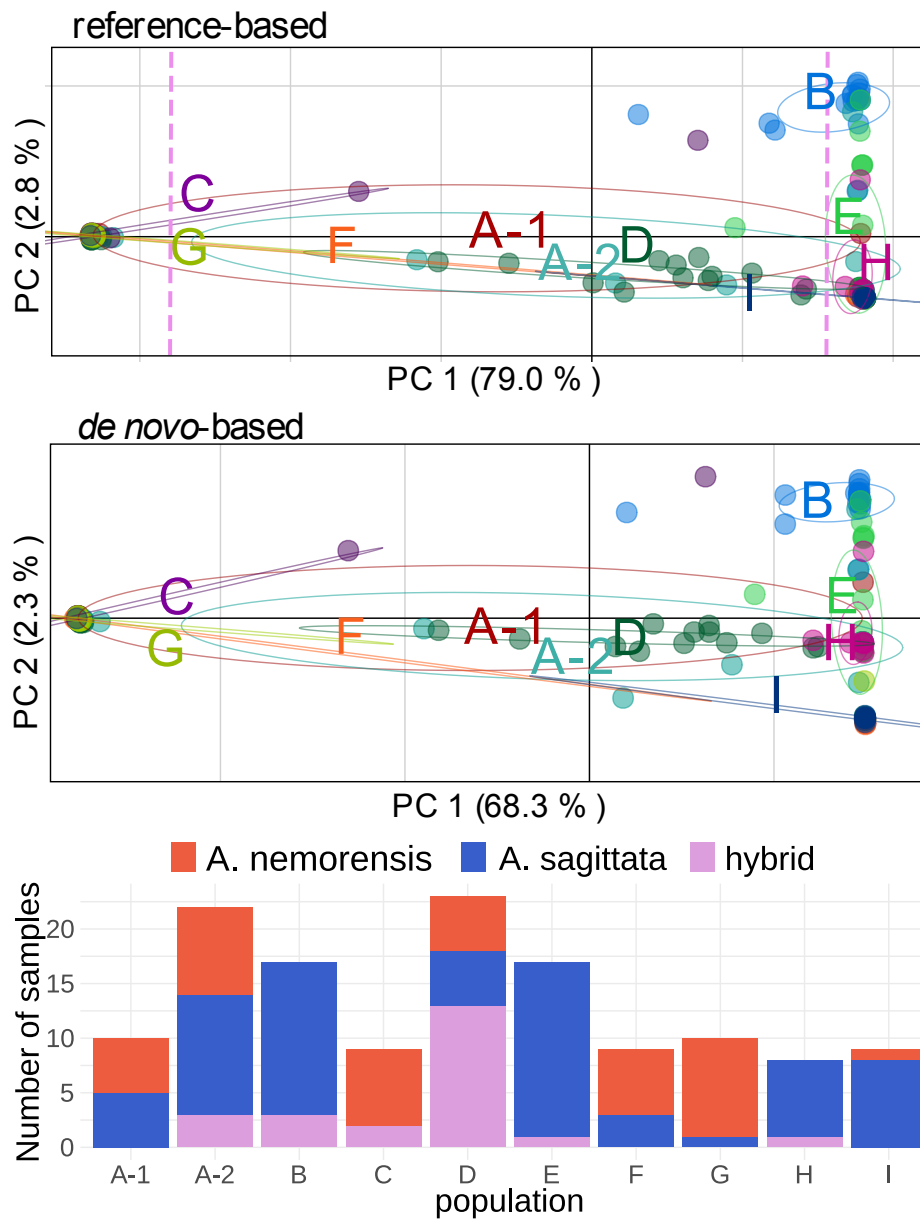

**Figure 2: Presence of two hybridizing *Arabis* species in study sites.**

Top) Plot of the first two principal components (PC) of genetic variation based on the reference-based pipeline. Values in brackets at the axis labels show the amount of variance explained by each PC. Text labels and colors distinguish the different sites. Text labels are approximately in the centroid of the respective site (with offset to avoid overlaps). The clusters on the left and on the right end of PC1 correspond to two distinct species which were identified as *Arabis nemorensis* and *Arabis sagittata* by phylogenetic analysis. Points in between are natural interspecific hybrids. The dashed lines show the species/hybrid thresholds used throughout this study. Middle) Plot showing the same analysis as above, but based on the de-novo-pipeline. Bottom) Stacked barplot showing the distribution of species among the study sites. Species are distributed heterogeneously among sites.

### No reduction of genetic diversity in restored sites

We computed species-specific estimates of genetic diversity within each site, excluding hybrid genotypes. The *A. nemorensis* dataset consisted of 2746 SNPs. Levels of genetic diversity ( $\pi$ ) varied up to two-fold among sites, ranging from 6.6e-05 in A-2 to 1.4e-04 in A-1 (Figure 4, left; Table S3). Total diversity was 1.5e-04. However, pristine and restored sites did not differ significantly in their level of diversity (mean difference= +10% in restored;  $W = 4$ ,  $p = 1$ ).

The *A. sagittata* dataset consisted of 6366 SNPs. Total genetic diversity in *A. sagittata* was about three times as high as in *A. nemorensis*. Yet, in contrast to *A. nemorensis*, genetic diversity differed strongly among sites, ranging from 1.03e-06 in site I to 4.26e-04 in site E (Figure 4, right; Table S3). Notably, genetic diversity was low in two of three pristine sites. In contrast, we found high levels of diversity in all restored sites, except site F. However, the overall difference between pristine and restored sites was not significant (mean difference= +163% in restored sites;  $W=13$ ,  $p=0.14$ ).

Since hybridization potentially enables gene flow between the two species we also compared levels of genetic diversity for both species combined, including the hybrids. Overall genetic diversity increased by an order of magnitude and mixed sites were more diverse than mostly pure sites, as would be expected. Again, restored sites did not show significantly different levels of genetic diversity from pristine sites (mean difference= +22%;  $W=13$ ,  $p=0.91$ ).

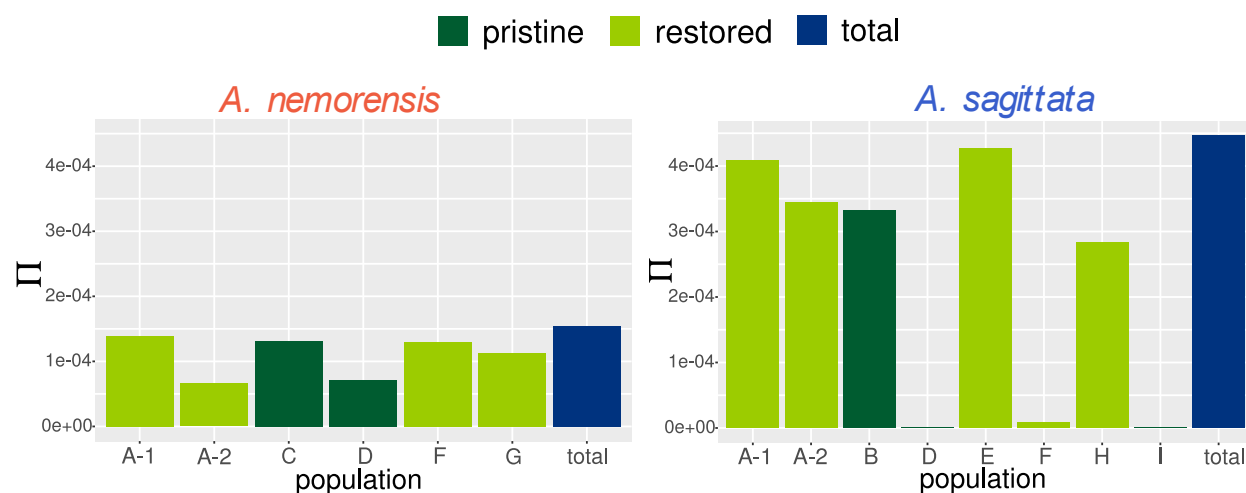

**Figure 3: No reduction in genetic diversity in restored sites**

Barplot of within average pairwise genetic diversity ( $\pi$ ) within each site of each species. Bar color indicates the type of site.

### Restoration reduces population structure and facilitates recombination

To quantify the degree of population structure, we estimated genetic distance and differentiation ( $F_{ST}$ ) among all pairs of sites (Table S4). Genetic distance among *A. nemorensis* sites ranged from 0.03 to 0.31 and  $F_{ST}$  estimates from 0 to 0.5 (mean=0.28) (Figure 4, A+C). Population structure was slightly more pronounced among pristine sites than restored sites: Mean genetic distance was 0.26 among pristine sites and 0.13 among restored sites ( $W=17$ ,  $p=0.047$ ); mean  $F_{ST}$  was 0.37 among pristine sites and 0.25 among restored sites ( $W=14$ ,  $p=0.26$ ).

In *A. sagittata*, genetic distance ranged from 0.32 to 0.34 (mean=0.33) and  $F_{ST}$  estimates from 0 to 0.91 (Figure 4, B+D). The difference in population structure between pristine and restored sites was stronger than in *A. nemorensis*: mean genetic distance was 0.33 among pristine sites and 0.12 among restored sites ( $W=45$ ,  $p=0.002$ ); mean  $F_{ST}$  was 0.79 among pristine sites and 0.12 among restored sites ( $W=43$ ,  $p=0.015$ ).

Reduced differentiation among restored sites suggests that genetic material of pristine sites was mixed in restored sites. To visualize this in more detail, we conducted ADMIXTURE analysis for



both species. This analysis assumes a given number (K) of genetic clusters (ancestral populations) and assigns cluster ancestry proportions to each individual, allowing for mixed ancestry. For *A. sagittata*, the three pristine sites built three distinct genetic clusters, which were mixed in all but one of the restored sites (Figure 4 F, Figure S3 for overview of all K). Additionally, we found individuals with mixed ancestry suggesting that outcrossing and recombination between clusters was taking place in restored sites. For *A. nemorensis*, we identified four genetic clusters distributed across multiple pristine sites (Figure 4 E, Figure S2 for overview of all K). These genetic clusters were also present in restored sites and potential recombinants occurred in both pristine and restored sites. Thus, admixture during hay-transfer did not have the same consequences in *A. nemorensis*, where pristine sites show a lower degree of genetic isolation.

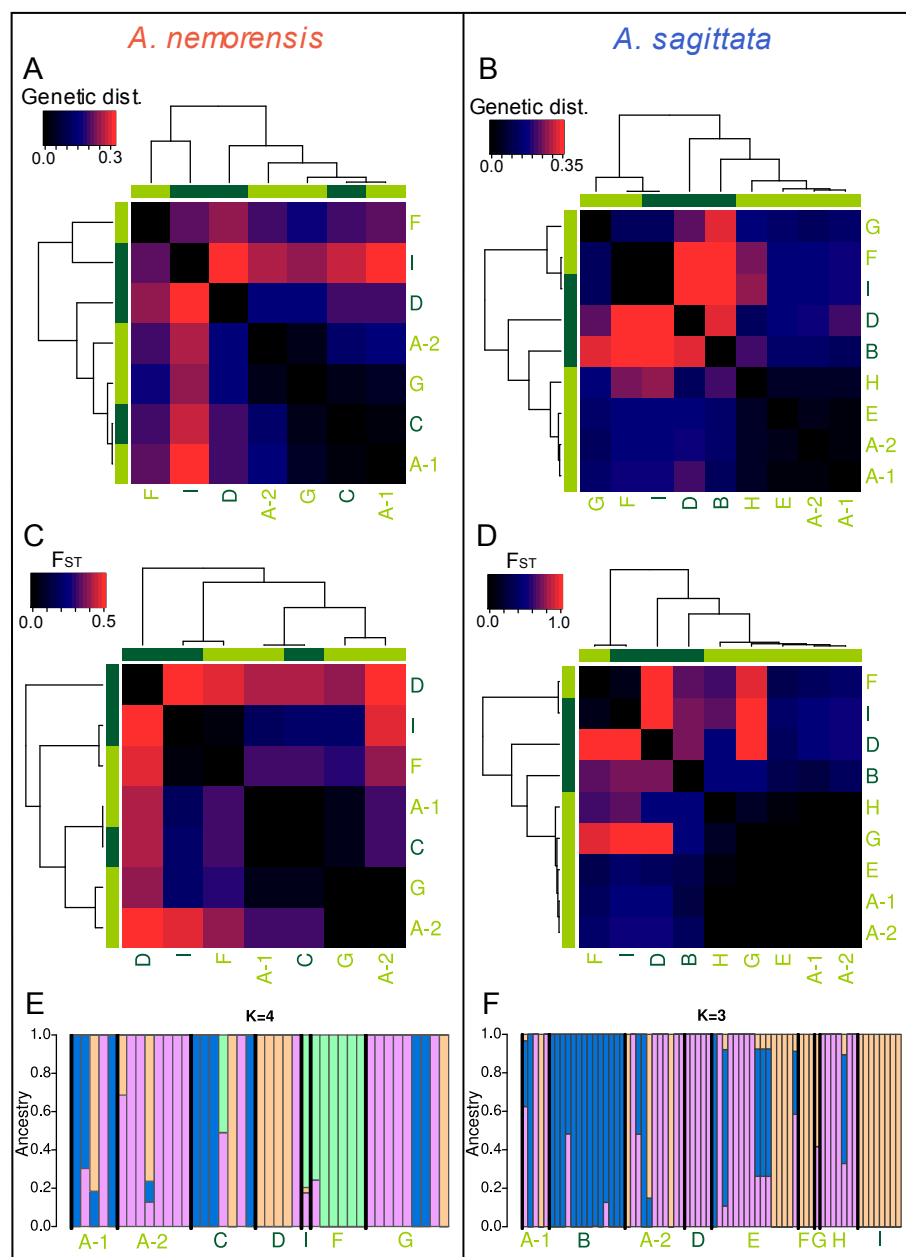

**Figure 4: Overall strong population structure with signatures of admixture in restored sites**

This panel compares different measurements of population structure of both species. A-D) Heatmaps showing pairwise comparisons between all sites of genetic distance (Cavalli-Sforza chord distance) and  $F_{ST}$ , respectively. Values of the variable are indicated by tile color, corresponding to the color scale in the top-left corner of each heatmap. Sites were clustered based on the respective variable, as indicated by the dendrograms. Colors of labels and bars next to the grid indicate the type of the site (same color scheme as Figure 3). E+F) Barplots representing the results of ADMIXTURE analysis. Each bar represents the proportion of ancestry of each genetic cluster for a single individual. Sites are separated by black lines. The number of clusters (K) assumed for the analysis is indicated above each plot.

## De-novo- and reference-based summary statistics reach the same conclusion

Finally, we tested whether a reference genome is required to determine the impact of restoration on genetic diversity. We found that estimates of genetic diversity, genetic distance or  $F_{ST}$  yielded by the two methods were highly correlated, with all correlation coefficients being greater than 0.95 (maximum  $p < 0.001$ , Figure 5). However, we observed that estimates of genetic diversity were deflated in the absence of a reference genome, especially for high diversity sites (Figure 5), by a median factor of 0.83 for *A. nemorensis* and 0.36 for *A. sagittata*. Estimates of genetic distance were underestimated by a median factor of 0.61 in both species. Interestingly, however, both pipelines yielded almost identical estimates of  $F_{ST}$  (median factor of 0.93) and revealed the same extent of admixture between sites (Figures S4-5). Moreover, the presence of the two species and their hybrids was detected with both methods (Figure 2 B).

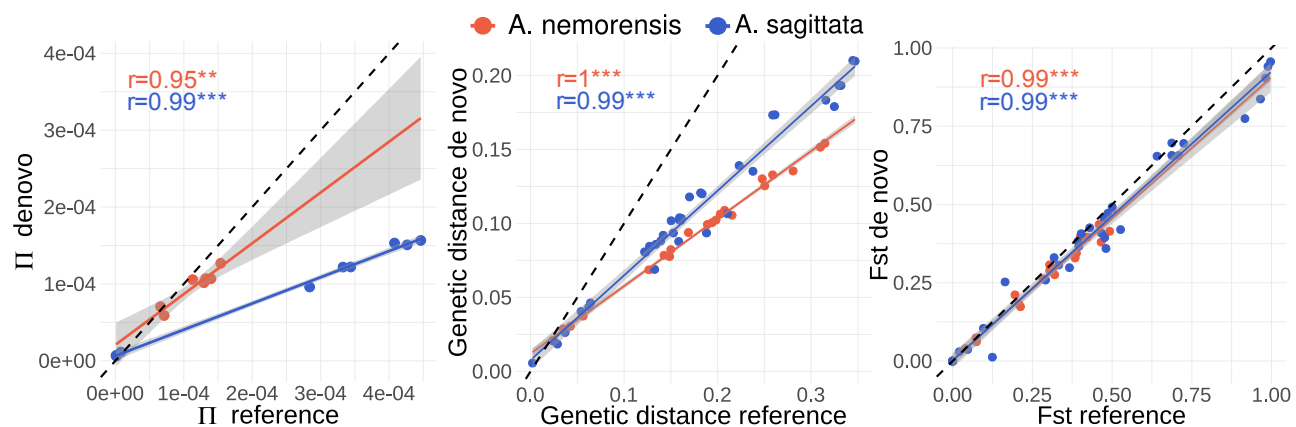

**Figure 5: De-novo- and reference-based summary statistics are highly correlated.**

Plots show the correlation of summary statistics based on the reference-based and the de-novo-based pipeline. Line and dot color represents the species. Each dot represents one individual. Lines represent a linear fit through the dots and the gray shadows indicate the error of the fit. The dashed line represents a 1:1 relationship of the estimates. Correlation coefficients are indicated as colored text corresponding to the species. Stars indicate the level of significance (\*\* $p < 0.01$ ; \*\*\* $p < 0.001$ ).

## Discussion

### A reference-genome is not required to characterize the impact of restoration

While RAD-seq and related methods are a cheap tool to acquire genotype information across the genome without need for a reference genome (Elshire et al., 2011; Etter et al., 2011;

Peterson et al., 2012), the reliability of *de novo* assembly pipelines has been questioned (Shafer et al., 2016). The availability of a reference genome allowed us to ask whether reference-based read mapping pipelines yielded distinct conclusions from a pipeline based on *de novo* read assembly. The results from both pipelines were highly correlated. Thus, comparative analysis of sites was reliable with both pipelines. However, the *de-novo*-pipeline (STACKS, Catchen et al., 2013) underestimated the amount of genetic diversity compared to the reference-based pipeline. This is in contrast to previous results (Shafer et al., 2016), where STACKS produced slightly inflated estimates compared to reference based pipelines. However, other *de novo* pipelines produced substantially lower estimates of genetic diversity (Shafer et al., 2016). Thus, the magnitude of genetic diversity estimates might depend on the study system and parameters used, and caution is advised when comparing these estimates across studies. In contrast, both pipelines agreed for analyses comparing diversity between species or sites (e.g.  $F_{ST}$ , ADMIXTURE). Thus, we conclude that RAD-seq is an efficient tool to characterize the distribution of diversity, even in the absence of a reference genome. We therefore hope that this study will pave the way for exploring how species, with diverse life-history and uncharacterized genomes, will be maintained after hay transfer or how modalities of hay transfer affects not only single species but the balance between multiple species in the community.

### First documented presence of *A. sagittata* in floodplain meadow habitat

We did not anticipate the presence of the morphologically similar species *A. sagittata* in floodplain habitats because it is predominantly found in warm and dry habitats (Hand & Gregor, 2006). However, agricultural land-use and flood regulation have considerably modified the floodplain ecosystem: flooding is contained by a dyke and the ground water level has decreased (Hölzel & Otte, 2001). Man-made modifications of the environment can change selection regimes and facilitate the establishment of non-native invasive species (Byers, 2002; Crooks, Chang, & Ruiz, 2011; Fukasawa, Miyashita, Hashimoto, Tatara, & Abe, 2013; Tyrrell &

Byers, 2007). Thus, it is possible that the migration of *A. sagittata* into the flood-plain ecosystem was facilitated by the decreased frequency and severity of flooding caused by human river regulation. We want to stress that the species co-occurred both in pristine and restored sites. Thus, the contact between the species was not caused by the restoration efforts. In fact, we observed that *A. sagittata* is more frequent than *A. nemorensis* in our sample, which raises the concern that this species may be in the process of displacing *A. nemorensis*. This trend could be enhanced by climate change, which may lead to conditions that further favor the xerothermophylic *A. sagittata*. Additionally, if *A. sagittata* is often mistaken for *A. nemorensis* in flora reports on flood-plain environments, the remaining *A. nemorensis* population in Central Europe might be even smaller than is currently assumed.

### The parallel transfer of two sympatric relatives shows that hay transfer maintains genetic diversity

Hay-transfer has proven to be a particularly successful method for establishing new populations of target species in ecological restoration across a variety of herbaceous vegetation types (Coiffait-Gombault, Buisson, & Dutoit, 2011; Hölzel & Otte, 2003; K. Kiehl et al., 2010; Kathrin Kiehl & Wagner, 2006; Török et al., 2012). Furthermore, hay transfer is often seen as the golden standard to preserve local levels of genetic diversity and adaptation (Vander Mijnsbrugge, Bischoff, & Smith, 2010). The latter is probably the main reason, why it is increasingly used in ecological restoration (Kathrin Kiehl et al., 2014). The aim of this study was to characterize the level of diversity in the pristine source sites and document the impact of hay-transfer on the genetic diversity in restored sites. Although our initial plan was to focus on *A. nemorensis*, a typical representative of species-rich floodplain meadows, the unanticipated presence of *A. sagittata* in our sample allowed us to compare the genetic effects of restoration by hay-transfer on the two species.

We did not find a significant difference in genetic diversity between pristine and restored sites for either of the two species, indicating that genetic diversity was completely transferred during

restoration. Our findings are in agreement with studies on population life-stage structure and dynamics comparing pristine and restored sites of *A. nemorensis*/*A. sagittata* in the same region (Burmeier et al., 2011). Since we sampled several years after the transfer, this result shows that hay transfer can capture the complete genetic diversity with initial material that excluded the seed bank. This result is particularly remarkable given that *A. nemorensis* has a long term seed bank, with up to 25,000 germinable seeds\*m<sup>-2</sup> (Burmeier et al., 2011). Although species for which the genetic diversity present in the seed bank tends to differ more strongly from the above ground diversity may fare differently after hay transfer, we note that populations restored with alternative methods, e.g. spontaneous recolonization (Vandepitte et al., 2012) or propagated seed mixtures (Espeland et al., 2017; Fant, Holmstrom, Sirkin, Etterson, & Masi, 2008), both excluded the seed bank and revealed a reduction of diversity (Mijangos et al., 2015). Thus, hay-transfer might be superior to other restoration methods not only in restoration success (Hölzel & Otte, 2003; K. Kiehl et al., 2010) but also in transferring genetic diversity.

### The modalities of habitat restoration can modify the relative adaptive potential of species in the ecosystem

Genetic diversity was low in *A. nemorensis* and *A. sagittata*, compared to either outcrossing or selfing Brassicaceae species (Mattila, Tyrmi, Pyhäjärvi, & Savolainen, 2017; Onge, Källman, Slotte, Lascoux, & Palmé, 2011). It approached levels of genetic diversity reported for *Arabis alpina* populations of Scandinavia (Laenen et al., 2018). As in our study, these populations are selfing and located on the margin of the species' range (Jalas & Suominen, 1994), two factors often coinciding with lower levels of genetic diversity. Since populations with low genetic diversity may suffer from increased genetic load and decreased adaptive potential, the transfer of non-local material is often envisaged to preserve endangered species (Breed, Stead, Ottewell, Gardner, & Lowe, 2013; Weeks et al., 2011). This approach is however controversial. Strategies that introduce non-local seeds can decrease population fitness either by introducing maladapted genotypes (Crémieux, Bischoff, Müller-Schärer, & Steinger, 2010; McKay, Christian,

Harrison, & Rice, 2005) or by causing outbreeding depression (Frankham et al., 2011). As a compromise, a strategy of mixing regional seeds was recently proposed (Bucharova et al., 2018). Our results show that this strategy was incidentally implemented in the examined restoration effort: Pristine *A. sagittata* sites are mostly dominated by a single genotype, which could represent independent founder genotypes in the colonization of the floodplain habitat. Yet, in some of the restored sites, admixture of low diversity *A. sagittata* sites took place, leading to a strong increase in genetic diversity. ADMIXTURE analysis also revealed that this led to genetic recombination of alleles in *A. sagittata* increasing the adaptive potential of restored sites in this species. Increased genetic connectivity between populations has been shown to help maintain or even increase genetic diversity in the long term (DiLeo, Rico, Boehmer, & Wagner, 2017). Fitness assays of recombined *A. sagittata* genotypes are needed to verify whether this local admixture has reinforced the establishment of this species in restored floodplain meadows.

Interestingly, we find less pronounced population structure in sites of *A. nemorensis* than in *A. sagittata*, suggesting that a higher level of gene flow helps maintain diversity within pristine sites. The restoration of this species will therefore not directly benefit from post-transfer admixture. More so, our results suggest that it is possible that the species is at increased disadvantage in restored habitats, if more competitive genotypes can evolve in *A. sagittata* thanks to admixture.

The coexistence of these species in the Rhine floodplain ecosystem will be further impacted by the ongoing hybridization dynamic that our analysis uncovers for the first time in this system and which occurred independently of the restoration effort. *A. nemorensis* could receive xero-thermophilic alleles from *A. sagittata* that may enhance its ability to cope with increased drought in its habitat. The genomic composition of the hybrids, however, also indicates that hybrids back-cross preferentially with *A. sagittata*. Geneflow from *A. nemorensis* could facilitate adaptation of *A. sagittata* to the flood-plain environment. Such adaptive introgressions could also potentially accelerate the extinction of *A. nemorensis*. While hybridization is common in plants (Mallet, Besansky, & Hahn, 2016), well documented cases of adaptive introgression are

rare and require elaborate experiments (Goulet, Roda, & Hopkins, 2017; Suarez-Gonzalez, Lexer, & Cronk, 2018). Such experiments are now warranted to determine the impact of hybridization in this sympatric species complex.

## Conclusions

Clearly, genetic analysis helps with species identification as sibling species can be difficult to distinguish morphologically even for specialists. A unique feature of hay-transfer restoration approaches is that the whole plant community can be transplanted. It is therefore particularly important to determine the composition of the source populations to limit the spread of non-target species (Bickford et al., 2007). Our study demonstrates that hay-transfer has maintained genetic diversity in restored populations. However, we also note that it may have inadvertently contributed to increase the genetic diversity and adaptive potential of only one of the two species, due to differences in the genetic makeup of the donor populations. This might lead to a competitive advantage of one over the other species in the long term, potentially disturbing the balance in the community. On the one hand this shows that restoration by hay-transfer can indeed enhance adaptive potential, which is especially important in the era of climate change. On the other hand, this also highlights that understanding the underlying genetics of the community to be transferred is a pre-requisite for the design of restoration strategies that promote the maintenance of both endangered ecosystems and endangered species.

## Acknowledgements

We thank Matthias Harnisch for providing information about the populations, Markus Koch for insightful discussions about the *A. hirsuta* tribe, Eric Schranz for his assistance with the pseudo-chromosome assembly and Gregor Schmitz for helpful feedback. Further, we thank Janine Altmüller, Christian Becker and the team of the Cologne Center for Genomics for their assistance in RAD-seq optimization, library preparation and sequencing. This work was partly



funded by the German Research Foundation ‘Deutsche Forschungsgemeinschaft DFG [DFG priority program 1529 ‘ADAPTOMICS’].

## References

- Smit, A., Hubley, R., & Green, P. (2013). *RepeatMasker Open-4.0*. Retrieved from <http://www.repeatmasker.org>
- Alexander, D. H., Novembre, J., & Lange, K. (2009). Fast model-based estimation of ancestry in unrelated individuals. *Genome Research*. <https://doi.org/10.1101/gr.094052.109>
- Altschul, S. F., Gish, W., Miller, W., Myers, E. W., & Lipman, D. J. (1990). Basic local alignment search tool. *Journal of Molecular Biology*, 215(3), 403–410. [https://doi.org/10.1016/S0022-2836\(05\)80360-2](https://doi.org/10.1016/S0022-2836(05)80360-2)
- Andrews, S. (2010). FastQC: a quality control tool for high throughput sequence data (Version 0.11.3). Retrieved from <http://www.bioinformatics.babraham.ac.uk/projects/fastqc>
- Arabidopsis Genome Initiative. (2000). Analysis of the genome sequence of the flowering plant *Arabidopsis thaliana*. *Nature*, 408(6814), 796–815. <https://doi.org/10.1038/35048692>
- Arnold, J. B., Daroczi, G., Werth, B., Weitzner, B., Kunst, J., Auguie, B., ... London, J. (2017). ggthemes: Extra Themes, Scales and Geoms for “ggplot2” (Version 3.4.0). Retrieved from <https://cran.r-project.org/web/packages/ggthemes/index.html>
- Baillie, J., Hilton-Taylor, C., & Stuart, S. N. (2004). *2004 IUCN Red List of threatened species : a global species assessment*. Retrieved from <https://portals.iucn.org/library/node/9830>
- Baquero, O. S. (2017). ggsm: North Symbols and Scale Bars for Maps Created with “ggplot2” or “ggmap” (Version 0.4.0). Retrieved from <https://CRAN.R-project.org/package=ggsm>
- Benayas, J. M. R., Newton, A. C., Diaz, A., & Bullock, J. M. (2009). Enhancement of Biodiversity and Ecosystem Services by Ecological Restoration: A Meta-Analysis. *Science*, 325(5944), 1121–1124. <https://doi.org/10.1126/science.1172460>
- Bickford, D., Lohman, D. J., Sodhi, N. S., Ng, P. K. L., Meier, R., Winker, K., ... Das, I. (2007). Cryptic species as a window on diversity and conservation. *Trends in Ecology & Evolution*, 22(3), 148–155. <https://doi.org/10.1016/j.tree.2006.11.004>
- Bradbury, I. R., Hamilton, L. C., Dempson, B., Robertson, M. J., Bourret, V., Bernatchez, L., & Verspoor, E. (2015). Transatlantic secondary contact in Atlantic Salmon, comparing microsatellites, a single nucleotide polymorphism array and restriction-site associated DNA sequencing for the resolution of complex spatial structure. *Molecular Ecology*, 24(20), 5130–5144. <https://doi.org/10.1111/mec.13395>
- Breed, M. F., Stead, M. G., Ottewell, K. M., Gardner, M. G., & Lowe, A. J. (2013). Which provenance and where? Seed sourcing strategies for revegetation in a changing environment. *Conservation Genetics*, 14(1), 1–10. <https://doi.org/10.1007/s10592-012-0425-z>
- Bucharova, A., Bossdorf, O., Hölzel, N., Kollmann, J., Prasse, R., & Durka, W. (2018). Mix and match: regional admixture provenancing strikes a balance among different seed-

- sourcing strategies for ecological restoration. *Conservation Genetics*. <https://doi.org/10.1007/s10592-018-1067-6>
- Bucharova, A., Michalski, S., Hermann, J.-M., Heveling, K., Durka, W., Hölzel, N., ... Bossdorf, O. (2017). Genetic differentiation and regional adaptation among seed origins used for grassland restoration: lessons from a multispecies transplant experiment. *Journal of Applied Ecology*, 54(1), 127–136. <https://doi.org/10.1111/1365-2664.12645>
- Bullock, J. M., Aronson, J., Newton, A. C., Pywell, R. F., & Rey-Benayas, J. M. (2011). Restoration of ecosystem services and biodiversity: conflicts and opportunities. *Trends in Ecology & Evolution*, 26(10), 541–549. <https://doi.org/10.1016/j.tree.2011.06.011>
- Burmeier, S., Eckstein, R. L., Donath, T. W., & Otte, A. (2011). Plant Pattern Development during Early Post-Restoration Succession in Grasslands—A Case Study of *Arabis nemorensis*. *Restoration Ecology*, 19(5), 648–659. <https://doi.org/10.1111/j.1526-100X.2010.00668.x>
- Byers, J. E. (2002). Impact of non-indigenous species on natives enhanced by anthropogenic alteration of selection regimes. *Oikos*, 97(3), 449–458. <https://doi.org/10.1034/j.1600-0706.2002.970316.x>
- Catchen, J., Hohenlohe, P. A., Bassham, S., Amores, A., & Cresko, W. A. (2013). Stacks: an analysis tool set for population genomics. *Molecular Ecology*, 22(11), 3124–3140. <https://doi.org/10.1111/mec.12354>
- Cavalli-Sforza, L. L., & Edwards, A. W. F. (1967). Phylogenetic analysis. Models and estimation procedures. *American Journal of Human Genetics*, 19(3 Pt 1), 233–257.
- Coiffait-Gombault, C., Buisson, E., & Dutoit, T. (2011). Hay Transfer Promotes Establishment of Mediterranean Steppe Vegetation on Soil Disturbed by Pipeline Construction. *Restoration Ecology*, 19(201), 214–222. <https://doi.org/10.1111/j.1526-100X.2010.00706.x>
- Crémieux, L., Bischoff, A., Müller-Schärer, H., & Steinger, T. (2010). Gene flow from foreign provenances into local plant populations: Fitness consequences and implications for biodiversity restoration. *American Journal of Botany*, 97(1), 94–100. <https://doi.org/10.3732/ajb.0900103>
- Crooks, J. A., Chang, A. L., & Ruiz, G. M. (2011). Aquatic pollution increases the relative success of invasive species. *Biological Invasions*, 13(1), 165–176. <https://doi.org/10.1007/s10530-010-9799-3>
- Crutsinger, G. M., Collins, M. D., Fordyce, J. A., Gompert, Z., Nice, C. C., & Sanders, N. J. (2006). Plant Genotypic Diversity Predicts Community Structure and Governs an Ecosystem Process. *Science*, 313(5789), 966–968. <https://doi.org/10.1126/science.1128326>
- Danecek, P., Auton, A., Abecasis, G., Albers, C. A., Banks, E., DePristo, M. A., ... Durbin, R. (2011). The variant call format and VCFtools. *Bioinformatics*, 27(15), 2156–2158. <https://doi.org/10.1093/bioinformatics/btr330>
- DiLeo, M. F., Rico, Y., Boehmer, H. J., & Wagner, H. H. (2017). An ecological connectivity network maintains genetic diversity of a flagship wildflower, *Pulsatilla vulgaris*. *Biological Conservation*, 212, 12–21. <https://doi.org/10.1016/j.biocon.2017.05.026>
- Donath, T. W., Bissels, S., Hölzel, N., & Otte, A. (2007). Large scale application of diaspore transfer with plant material in restoration practice – Impact of seed and microsite

- limitation. *Biological Conservation*, 138(1), 224–234. <https://doi.org/10.1016/j.biocon.2007.04.020>
- Elshire, R. J., Glaubitz, J. C., Sun, Q., Poland, J. A., Kawamoto, K., Buckler, E. S., & Mitchell, S. E. (2011). A Robust, Simple Genotyping-by-Sequencing (GBS) Approach for High Diversity Species. *PLOS ONE*, 6(5), e19379. <https://doi.org/10.1371/journal.pone.0019379>
- Espeland, E. K., Emery, N. C., Mercer, K. L., Woolbright, S. A., Kettenring, K. M., Gepts, P., & Etterson, J. R. (2017). Evolution of plant materials for ecological restoration: insights from the applied and basic literature. *Journal of Applied Ecology*, 54(1), 102–115. <https://doi.org/10.1111/1365-2664.12739>
- Etter, P. D., Bassham, S., Hohenlohe, P. A., Johnson, E. A., & Cresko, W. A. (2011). SNP discovery and genotyping for evolutionary genetics using RAD sequencing. *Methods in Molecular Biology (Clifton, N.J.)*, 772, 157–178. [https://doi.org/10.1007/978-1-61779-228-1\\_9](https://doi.org/10.1007/978-1-61779-228-1_9)
- Fant, J. B., Holmstrom, R. M., Sirkin, E., Etterson, J. R., & Masi, S. (2008). Genetic Structure of Threatened Native Populations and Propagules Used for Restoration in a Clonal Species, American Beachgrass (*Ammophila breviligulata* Fern.). *Restoration Ecology*, 16(4), 594–603. <https://doi.org/10.1111/j.1526-100X.2007.00348.x>
- Frankham, R., Ballou, J. D., Eldridge, M. D. B., Lacy, R. C., Ralls, K., Dudash, M. R., & Fenster, C. B. (2011). Predicting the probability of outbreeding depression. *Conservation Biology: The Journal of the Society for Conservation Biology*, 25(3), 465–475. <https://doi.org/10.1111/j.1523-1739.2011.01662.x>
- Fukasawa, K., Miyashita, T., Hashimoto, T., Tatara, M., & Abe, S. (2013). Differential population responses of native and alien rodents to an invasive predator, habitat alteration and plant masting. *Proceedings of the Royal Society of London B: Biological Sciences*, 280(1773), 20132075. <https://doi.org/10.1098/rspb.2013.2075>
- Gao, S., Bertrand, D., Chia, B. K. H., & Nagarajan, N. (2016). OPERA-LG: efficient and exact scaffolding of large, repeat-rich eukaryotic genomes with performance guarantees. *Genome Biology*, 17, 102. <https://doi.org/10.1186/s13059-016-0951-y>
- Gnerre, S., MacCallum, I., Przybylski, D., Ribeiro, F. J., Burton, J. N., Walker, B. J., ... Jaffe, D. B. (2011). High-quality draft assemblies of mammalian genomes from massively parallel sequence data. *Proceedings of the National Academy of Sciences*, 108(4), 1513–1518. <https://doi.org/10.1073/pnas.1017351108>
- Goudet, J., & Jombart, T. (2015). hierfstat: Estimation and Tests of Hierarchical F-Statistics (Version 0.04-22). Retrieved from <https://cran.r-project.org/web/packages/hierfstat/index.html>
- Goulet, B. E., Roda, F., & Hopkins, R. (2017). Hybridization in Plants: Old Ideas, New Techniques. *Plant Physiology*, 173(1), 65–78. <https://doi.org/10.1104/pp.16.01340>
- Gruenthal, K. M., Witting, D. A., Ford, T., Neuman, M. J., Williams, J. P., Pondella, D. J., ... Larson, W. A. (2014). Development and application of genomic tools to the restoration of green abalone in southern California. *Conservation Genetics*, 15(1), 109–121. <https://doi.org/10.1007/s10592-013-0524-5>
- Haas, B. J., Salzberg, S. L., Zhu, W., Pertea, M., Allen, J. E., Orvis, J., ... Wortman, J. R. (2008). Automated eukaryotic gene structure annotation using EVIDENCEModeler and the

- Program to Assemble Spliced Alignments. *Genome Biology*, 9(1), R7. <https://doi.org/10.1186/gb-2008-9-1-r7>
- Hand, R., & Gregor, T. (2006). Die Verbreitung von *Arabis sagittata* In Deutschland. Ergebnisse einer Herbarstudie. *Kochia*, 1, 21–31.
- Haug-Baltzell, A., Stephens, S. A., Davey, S., Scheidegger, C. E., & Lyons, E. (2017). SynMap2 and SynMap3D: web-based whole-genome synteny browsers. *Bioinformatics*, 33(14), 2197–2198. <https://doi.org/10.1093/bioinformatics/btx144>
- Hölzel, N., & Otte, A. (2001). The impact of flooding regime on the soil seed bank of flood-meadows. *Journal of Vegetation Science*, 12(2), 209–218. <https://doi.org/10.2307/3236605>
- Hölzel, N., & Otte, A. (2003). Restoration of a species-rich flood meadow by topsoil removal and diaspore transfer with plant material. *Applied Vegetation Science*, 6(2), 131–140. <https://doi.org/10.1111/j.1654-109X.2003.tb00573.x>
- Hölzel, N., & Otte, A. (2004). Assessing soil seed bank persistence in flood-meadows: The search for reliable traits. *Journal of Vegetation Science*, 15(1), 93–100. <https://doi.org/10.1111/j.1654-1103.2004.tb02241.x>
- Hu, T. T., Pattyn, P., Bakker, E. G., Cao, J., Cheng, J.-F., Clark, R. M., ... Guo, Y.-L. (2011). The *Arabidopsis lyrata* genome sequence and the basis of rapid genome size change. *Nature Genetics*, 43(5), 476–481. <https://doi.org/10.1038/ng.807>
- Hufford, K. M., & Mazer, S. J. (2003). Plant ecotypes: genetic differentiation in the age of ecological restoration. *Trends in Ecology & Evolution*, 18(3), 147–155. [https://doi.org/10.1016/S0169-5347\(03\)00002-8](https://doi.org/10.1016/S0169-5347(03)00002-8)
- Hughes, A. R., Inouye, B. D., Johnson, M. T. J., Underwood, N., & Vellend, M. (2008). Ecological consequences of genetic diversity. *Ecology Letters*, 11(6), 609–623. <https://doi.org/10.1111/j.1461-0248.2008.01179.x>
- Jalas, J., & Suominen, J. (1994). *Atlas Florae Europaeae. Distribution of Vascular Plants in Europe 10: Cruciferae (Sisymbrium to Aubrieta)* (Vol. 10). The Committee for Mapping the Flora of Europe & Societas Biologica Fennica Vanamo, Helsinki.
- Jeffries, D. L., Copp, G. H., Handley, L. L., Olsén, K. H., Sayer, C. D., & Hänfling, B. (2016). Comparing RADseq and microsatellites to infer complex phylogeographic patterns, an empirical perspective in the Crucian carp, *Carassius carassius*, L. *Molecular Ecology*, 25(13), 2997–3018. <https://doi.org/10.1111/mec.13613>
- Jiao, W.-B., Accinelli, G. G., Hartwig, B., Kiefer, C., Baker, D., Severing, E., ... Schneeberger, K. (2017). Improving and correcting the contiguity of long-read genome assemblies of three plant species using optical mapping and chromosome conformation capture data. *Genome Research*, gr.213652.116. <https://doi.org/10.1101/gr.213652.116>
- Jombart, T., Kamvar, Z. N., Lustrik, R., Collins, C., Beugin, M.-P., Knaus, B., ... Calboli, F. (2016). adegenet: Exploratory Analysis of Genetic and Genomic Data (Version 2.0.1). Retrieved from <https://cran.r-project.org/web/packages/adegenet/index.html>
- Kahle, D., & Wickham, H. (2013). ggmap: Spatial Visualization with ggplot2. *The R Journal*, 5(1), 144–161.

- Karl, R., & Koch, M. A. (2014). Phylogenetic signatures of adaptation: The *Arabis hirsuta* species aggregate (Brassicaceae) revisited. *Perspectives in Plant Ecology, Evolution and Systematics*, 16(5), 247–264. <https://doi.org/10.1016/j.ppees.2014.06.001>
- Kiefer, M., Schmickl, R., German, D. A., Mandáková, T., Lysak, M. A., Al-Shehbaz, I. A., ... Koch, M. A. (2014). BrassiBase: introduction to a novel knowledge database on Brassicaceae evolution. *Plant & Cell Physiology*, 55(1), e3. <https://doi.org/10.1093/pcp/pct158>
- Kiehl, K., Kirmer, A., Donath, T. W., Rasran, L., & Hölzel, N. (2010). Species introduction in restoration projects - evaluation of different techniques for the establishment of semi-natural grasslands in Central and Northwestern Europe. *Basic and Applied Ecology*, 11(4), 285–299.
- Kiehl, Kathrin, Kirmer, A., & Shaw, N. (2014). *Guidelines for Native Seed Production and Grassland Restoration*. Cambridge Scholars Publishing.
- Kiehl, Kathrin, & Wagner, C. (2006). Effect of Hay Transfer on Long-Term Establishment of Vegetation and Grasshoppers on Former Arable Fields. *Restoration Ecology*, 14(1), 157–166. <https://doi.org/10.1111/j.1526-100X.2006.00116.x>
- Knaus, B. J., & Grünwald, N. J. (2017). VCFR: a package to manipulate and visualize variant call format data in R. *Molecular Ecology Resources*, 17(1), 44–53.
- Koboldt, D. C., Zhang, Q., Larson, D. E., Shen, D., McLellan, M. D., Lin, L., ... Wilson, R. K. (2012). VarScan 2: Somatic mutation and copy number alteration discovery in cancer by exome sequencing. *Genome Research*, 22(3), 568–576. <https://doi.org/10.1101/gr.129684.111>
- Kopelman, N. M., Mayzel, J., Jakobsson, M., Rosenberg, N. A., & Mayrose, I. (2015). Clumpak: a program for identifying clustering modes and packaging population structure inferences across K. *Molecular Ecology Resources*, 15(5), 1179–1191. <https://doi.org/10.1111/1755-0998.12387>
- Korf, I. (2004). Gene finding in novel genomes. *BMC Bioinformatics*, 5, 59. <https://doi.org/10.1186/1471-2105-5-59>
- Laenen, B., Tedder, A., Nowak, M. D., Toräng, P., Wunder, J., Wötzel, S., ... Slotte, T. (2018). Demography and mating system shape the genome-wide impact of purifying selection in *Arabis alpina*. *Proceedings of the National Academy of Sciences*, 201707492. <https://doi.org/10.1073/pnas.1707492115>
- Li, H., & Durbin, R. (2009). Fast and accurate short read alignment with Burrows–Wheeler transform. *Bioinformatics*, 25(14), 1754–1760. <https://doi.org/10.1093/bioinformatics/btp324>
- Li, H., Handsaker, B., Wysoker, A., Fennell, T., Ruan, J., Homer, N., ... 1000 Genome Project Data Processing Subgroup. (2009). The Sequence Alignment/Map format and SAMtools. *Bioinformatics* (Oxford, England), 25(16), 2078–2079. <https://doi.org/10.1093/bioinformatics/btp352>
- Lyons, E., & Freeling, M. (2008). How to usefully compare homologous plant genes and chromosomes as DNA sequences. *The Plant Journal*, 53(4), 661–673. <https://doi.org/10.1111/j.1365-3113X.2007.03326.x>



- Lyons, E., Freeling, M., Kustu, S., & Inwood, W. (2011). Using Genomic Sequencing for Classical Genetics in *E. coli* K12. *PLOS ONE*, 6(2), e16717. <https://doi.org/10.1371/journal.pone.0016717>
- Majoros, W. H., Pertea, M., & Salzberg, S. L. (2004). TigrScan and GlimmerHMM: two open source ab initio eukaryotic gene-finders. *Bioinformatics (Oxford, England)*, 20(16), 2878–2879. <https://doi.org/10.1093/bioinformatics/bth315>
- Mallet, J., Besansky, N., & Hahn, M. W. (2016). How reticulated are species? *BioEssays*, 38(2), 140–149. <https://doi.org/10.1002/bies.201500149>
- Martin, M. (2011). Cutadapt removes adapter sequences from high-throughput sequencing reads. *EMBnet.Journal*, 17(1), 10–12. <https://doi.org/10.14806/ej.17.1.200>
- Massatti, R., Doherty, K. D., & Wood, T. E. (2018). Resolving neutral and deterministic contributions to genomic structure in *Syntrichia ruralis* (Bryophyta, Pottiaceae) informs propagule sourcing for dryland restoration. *Conservation Genetics*, 19(1), 85–97. <https://doi.org/10.1007/s10592-017-1026-7>
- Mattila, T. M., Tyrmi, J., Pyhäjärvi, T., & Savolainen, O. (2017). Genome-Wide Analysis of Colonization History and Concomitant Selection in *Arabidopsis lyrata*. *Molecular Biology and Evolution*, 34(10), 2665–2677. <https://doi.org/10.1093/molbev/msx193>
- McKay, J. K., Christian, C. E., Harrison, S., & Rice, K. J. (2005). “How Local Is Local?”—A Review of Practical and Conceptual Issues in the Genetics of Restoration. *Restoration Ecology*, 13(3), 432–440. <https://doi.org/10.1111/j.1526-100X.2005.00058.x>
- Mijangos, J. L., Pacioni, C., Spencer, P. B. S., & Craig, M. D. (2015). Contribution of genetics to ecological restoration. *Molecular Ecology*, 24(1), 22–37. <https://doi.org/10.1111/mec.12995>
- Mummenhoff, K., Franzke, A., & Koch, M. (1997). Molecular phylogenetics of *Thlaspi* s.l. (Brassicaceae) based on chloroplast DNA restriction site variation and sequences of the internal transcribed spacers of nuclear ribosomal DNA. *Canadian Journal of Botany*, 75(3), 469–482. <https://doi.org/10.1139/b97-051>
- Nei, M. (1987). *Molecular evolutionary genetics*. Columbia university press.
- O’Leary, S. J., Hollenbeck, C. M., Vega, R. R., Gold, J. R., & Portnoy, D. S. (2018). Genetic mapping and comparative genomics to inform restoration enhancement and culture of southern flounder, *Paralichthys lethostigma*. *BMC Genomics*, 19(1), 163. <https://doi.org/10.1186/s12864-018-4541-0>
- Onge, K. R. S., Källman, T., Slotte, T., Lascoux, M., & Palmé, A. E. (2011). Contrasting demographic history and population structure in *Capsella rubella* and *Capsella grandiflora*, two closely related species with different mating systems. *Molecular Ecology*, 20(16), 3306–3320. <https://doi.org/10.1111/j.1365-294X.2011.05189.x>
- Paradis, E., Jombart, T., Schliep, K., Potts, A., & Winter, D. (2016). pegas: Population and Evolutionary Genetics Analysis System (Version 0.9). Retrieved from <https://cran.r-project.org/web/packages/pegas/index.html>
- Peterson, B. K., Weber, J. N., Kay, E. H., Fisher, H. S., & Hoekstra, H. E. (2012). Double Digest RADseq: An Inexpensive Method for De Novo SNP Discovery and Genotyping in Model

- and Non-Model Species. *PLoS ONE*, 7(5), e37135. <https://doi.org/10.1371/journal.pone.0037135>
- Pfeifer, B., Wittelsbuerger, U., Li, H., & Handsaker, B. (2018). PopGenome: An Efficient Swiss Army Knife for Population Genomic Analyses (Version 2.6.1). Retrieved from <https://CRAN.R-project.org/package=PopGenome>
- Purcell, S. (2009). PLINK (Version 1.07).
- Purcell, S., Neale, B., Todd-Brown, K., Thomas, L., Ferreira, M. A. R., Bender, D., ... Sham, P. C. (2007). PLINK: a tool set for whole-genome association and population-based linkage analyses. *American Journal of Human Genetics*, 81(3), 559–575. <https://doi.org/10.1086/519795>
- R Development Core Team. (2008). *R: A Language and Environment for Statistical Computing*. Vienna, Austria: R Foundation for Statistical Computing. Retrieved from <http://www.R-project.org>
- Reed, D. H., & Frankham, R. (2003). Correlation between Fitness and Genetic Diversity. *Conservation Biology*, 17(1), 230–237. <https://doi.org/10.1046/j.1523-1739.2003.01236.x>
- Reusch, T. B. H., Ehlers, A., Hämmerli, A., & Worm, B. (2005). Ecosystem recovery after climatic extremes enhanced by genotypic diversity. *Proceedings of the National Academy of Sciences of the United States of America*, 102(8), 2826–2831. <https://doi.org/10.1073/pnas.0500008102>
- Reynolds, L. K., McGlathery, K. J., & Waycott, M. (2012). Genetic Diversity Enhances Restoration Success by Augmenting Ecosystem Services. *PLOS ONE*, 7(6), e38397. <https://doi.org/10.1371/journal.pone.0038397>
- Roberts, L., Stone, R., & Sugden, A. (2009). The Rise of Restoration Ecology. *Science*, 325(5940), 555–555. [https://doi.org/10.1126/science.325\\_555](https://doi.org/10.1126/science.325_555)
- Rochette, N. C., & Catchen, J. M. (2017). Deriving genotypes from RAD-seq short-read data using Stacks. *Nature Protocols*, 12(12), 2640–2659. <https://doi.org/10.1038/nprot.2017.123>
- Scheepens, J. F., Rauschkolb, R., Ziegler, R., Schroth, V., & Bossdorf, O. (2017). Genotypic diversity and environmental variability affect the invasibility of experimental plant populations. *Oikos*, 127(4), 570–578. <https://doi.org/10.1111/oik.04818>
- Schnittler, M., & Günther, K.-F. (1999). Central European vascular plants requiring priority conservation measures – an analysis from national Red Lists and distribution maps. *Biodiversity & Conservation*, 8(7), 891–925. <https://doi.org/10.1023/A:1008828704456>
- Shafer, A. B. A., Peart, C. R., Tusso, S., Maayan, I., Brelsford, A., Wheat, C. W., & Wolf, J. B. W. (2016). Bioinformatic processing of RAD-seq data dramatically impacts downstream population genetic inference. *Methods in Ecology and Evolution*, 8(8), 907–917. <https://doi.org/10.1111/2041-210X.12700>
- Slater, G. S. C., & Birney, E. (2005). Automated generation of heuristics for biological sequence comparison. *BMC Bioinformatics*, 6, 31. <https://doi.org/10.1186/1471-2105-6-31>
- Smit, A., & Hubley, R. (2008). RepeatModeler Open-1.0 (Version 1.0). Retrieved from <http://www.repeatmasker.org>

- Society for Ecological Restoration International Science & Policy Working Group. (2004). *The SER International Primer on Ecological Restoration*. www.ser.org & Tucson: Society for Ecological Restoration International.
- Stanke, M., & Waack, S. (2003). Gene prediction with a hidden Markov model and a new intron submodel. *Bioinformatics (Oxford, England)*, 19 Suppl 2, ii215-225.
- Suarez-Gonzalez, A., Lexer, C., & Cronk, Q. C. B. (2018). Adaptive introgression: a plant perspective. *Biology Letters*, 14(3), 20170688. <https://doi.org/10.1098/rsbl.2017.0688>
- Suding, K. N. (2011). Toward an Era of Restoration in Ecology: Successes, Failures, and Opportunities Ahead. *Annual Review of Ecology, Evolution, and Systematics*, 42(1), 465–487. <https://doi.org/10.1146/annurev-ecolsys-102710-145115>
- Tellier, A., Laurent, S. J. Y., Lainer, H., Pavlidis, P., & Stephan, W. (2011). Inference of seed bank parameters in two wild tomato species using ecological and genetic data. *Proceedings of the National Academy of Sciences*, 108(41), 17052–17057. <https://doi.org/10.1073/pnas.1111266108>
- Török, P., Migléc, T., Valkó, O., Kelemen, A., Tóth, K., Lengyel, S., & Tóthmérész, B. (2012). Fast restoration of grassland vegetation by a combination of seed mixture sowing and low-diversity hay transfer. *Ecological Engineering*, 44, 133–138. <https://doi.org/10.1016/j.ecoleng.2012.03.010>
- Torres-Martinez, L., & Emery, N. C. (2016). Genome-wide SNP discovery in the annual herb, *Lasthenia fremontii* (Asteraceae): genetic resources for the conservation and restoration of a California vernal pool endemic. *Conservation Genetics Resources*, 8(2), 145–158. <https://doi.org/10.1007/s12686-016-0524-0>
- Tyrrell, M. C., & Byers, J. E. (2007). Do artificial substrates favor nonindigenous fouling species over native species? *Journal of Experimental Marine Biology and Ecology*, 342(1), 54–60. <https://doi.org/10.1016/j.jembe.2006.10.014>
- Vandepitte, K., Gristina, A. S., Hert, K. D., Meekers, T., Roldán-Ruiz, I., & Honnay, O. (2012). Recolonization after habitat restoration leads to decreased genetic variation in populations of a terrestrial orchid. *Molecular Ecology*, 21(17), 4206–4215. <https://doi.org/10.1111/j.1365-294X.2012.05698.x>
- Vander Mijnsbrugge, K., Bischoff, A., & Smith, B. (2010). A question of origin: Where and how to collect seed for ecological restoration. *Basic and Applied Ecology*, 11(4), 300–311. <https://doi.org/10.1016/j.baae.2009.09.002>
- Vrijenhoek, R. C. (1994). Genetic diversity and fitness in small populations. In V. Loeschcke, S. K. Jain, & J. Tomiuk (Eds.), *Conservation Genetics* (pp. 37–53). Basel: Birkhäuser Basel. [https://doi.org/10.1007/978-3-0348-8510-2\\_5](https://doi.org/10.1007/978-3-0348-8510-2_5)
- Weeks, A. R., Sgro, C. M., Young, A. G., Frankham, R., Mitchell, N. J., Miller, K. A., ... Hoffmann, A. A. (2011). Assessing the benefits and risks of translocations in changing environments: a genetic perspective. *Evolutionary Applications*, 4(6), 709–725. <https://doi.org/10.1111/j.1752-4571.2011.00192.x>
- Wickham, H. (2009). *ggplot2: Elegant Graphics for Data Analysis*. Springer-Verlag New York. Retrieved from <http://ggplot2.org>



- Williams, A. V., Nevill, P. G., & Krauss, S. L. (2014). Next generation restoration genetics: applications and opportunities. *Trends in Plant Science*, 19(8), 529–537. <https://doi.org/10.1016/j.tplants.2014.03.011>
- Willing, E.-M., Rawat, V., Mandáková, T., Maumus, F., James, G. V., Nordström, K. J. V., ... Schneeberger, K. (2015). Genome expansion of *Arabis alpina* linked with retrotransposition and reduced symmetric DNA methylation. *Nature Plants*, 1(2), 14023. <https://doi.org/10.1038/nplants.2014.23>
- Zhao, S., Guo, Y., Sheng, Q., & Shyr, Y. (2015). heatmap3: An Improved Heatmap Package (Version 1.1.1). Retrieved from <https://cran.r-project.org/web/packages/heatmap3/index.html>

## Data availability

The genome assembly, annotation, raw reads and RAD-seq samples will be uploaded to EMBL ENA upon acceptance (available upon request for review). VCF files and custom script will be uploaded to Dryad repository upon acceptance (available upon request for review). An R Markdown file describing the population genetic analysis is provided in the supplemental material.

## Author contributions

JdM, HD, AT and NH conceived the study. HD and NH collected plant material; HD and CB prepared material for sequencing; WBJ, KS and HD were responsible for bioinformatic processing. JdM, HD and NH analyzed data and wrote the manuscript with significant contributions from CB, WBJ, KS and AT.
